# Supplementary material
Source: Research Square preprint supplement (doi:10.21203/rs.3.rs-9861346/v1)
Supplement: Supplementary file 1 [file 1ffc6c970bc41a97cb83faf1.docx]

**Pubmed Query:**

(

"computer vision"[Title/Abstract] OR "medical imaging"[Title/Abstract] OR "clinical imaging"[Title/Abstract] OR "diagnostic imaging"[Title/Abstract] OR "Diagnostic Imaging"[MeSH Terms] OR radiograph*[Title/Abstract] OR "X-ray"[Title/Abstract] OR "X-rays"[Title/Abstract] OR "computed tomography"[Title/Abstract] OR "CT scan"[Title/Abstract] OR "CT imaging"[Title/Abstract] OR "Tomography, X-Ray Computed"[MeSH Terms] OR "magnetic resonance imaging"[Title/Abstract] OR "MR imaging"[Title/Abstract] OR "MRI"[Title/Abstract] OR "Magnetic Resonance Imaging"[MeSH Terms] OR mammograph*[Title/Abstract] OR "mammogram"[Title/Abstract] OR "Mammography"[MeSH Terms] OR fluoroscop*[Title/Abstract] OR "Fluoroscopy"[MeSH Terms] OR angiograph*[Title/Abstract] OR "Angiography"[MeSH Terms] OR "positron emission tomography"[Title/Abstract] OR "PET-CT"[Title/Abstract] OR "PET/CT"[Title/Abstract] OR "Positron-Emission Tomography"[MeSH Terms] OR "SPECT"[Title/Abstract] OR "Tomography, Emission-Computed, Single-Photon"[MeSH Terms] OR scintigraph*[Title/Abstract] OR "ultrasound"[Title/Abstract] OR ultrasonograph*[Title/Abstract] OR "Ultrasonography"[MeSH Terms] OR echocardiograph*[Title/Abstract] OR "Echocardiography"[MeSH Terms] OR "whole slide"[Title/Abstract] OR "whole-slide"[Title/Abstract] OR histolog*[Title/Abstract] OR histopatholog*[Title/Abstract] OR cytolog*[Title/Abstract] OR "digital pathology"[Title/Abstract] OR "Histological Techniques"[MeSH Terms] OR "Histocytochemistry"[MeSH Terms] OR endoscop*[Title/Abstract] OR colonoscop*[Title/Abstract] OR bronchoscop*[Title/Abstract] OR cystoscop*[Title/Abstract] OR laryngoscop*[Title/Abstract] OR hysteroscop*[Title/Abstract] OR "capsule endoscopy"[Title/Abstract] OR gastroscop*[Title/Abstract] OR "esophagogastroduodenoscopy"[Title/Abstract] OR "oesophagogastroduodenoscopy"[Title/Abstract] OR "Endoscopy"[MeSH Terms] OR "fundus"[Title/Abstract] OR fundoscop*[Title/Abstract] OR "optical coherence tomography"[Title/Abstract] OR "Tomography, Optical Coherence"[MeSH Terms] OR "slit-lamp"[Title/Abstract] OR "slit lamp"[Title/Abstract] OR "retinal imaging"[Title/Abstract] OR "Fundus Oculi"[MeSH Terms] OR dermoscop*[Title/Abstract] OR dermatoscop*[Title/Abstract] OR "Dermoscopy"[MeSH Terms] OR "surgical video"[Title/Abstract] OR laparoscop*[Title/Abstract] OR "robotic surgery"[Title/Abstract] OR "intraoperative imaging"[Title/Abstract] OR "Laparoscopy"[MeSH Terms] OR "orthopantomography"[Title/Abstract] OR "panoramic radiograph"[Title/Abstract] OR "dental radiograph*"[Title/Abstract] OR "cone beam computed tomography"[Title/Abstract] OR "CBCT"[Title/Abstract] OR "Cone-Beam Computed Tomography"[MeSH Terms] OR "blood smear"[Title/Abstract] OR "peripheral blood"[Title/Abstract] OR "bone marrow"[Title/Abstract] OR "blood film"[Title/Abstract] OR otoscop*[Title/Abstract] OR "Otoscopy"[MeSH Terms] OR "fetal ultrasound"[Title/Abstract] OR "obstetric ultrasound"[Title/Abstract] OR "prenatal ultrasound"[Title/Abstract] OR "Ultrasonography, Prenatal"[MeSH Terms]

)

AND

(

"artificial intelligence"[Title/Abstract] OR "Artificial Intelligence"[MeSH Terms] OR "deep learning"[Title/Abstract] OR "Deep Learning"[MeSH Terms] OR "machine learning"[Title/Abstract] OR "Machine Learning"[MeSH Terms] OR "neural network"[Title/Abstract] OR "neural networks"[Title/Abstract] OR "Neural Networks, Computer"[MeSH Terms] OR "transfer learning"[Title/Abstract] OR "self-supervised learning"[Title/Abstract] OR "contrastive learning"[Title/Abstract] OR "semi-supervised learning"[Title/Abstract] OR "federated learning"[Title/Abstract] OR "attention mechanism"[Title/Abstract] OR "pre-trained model"[Title/Abstract] OR "pretrained model"[Title/Abstract] OR "convolutional neural network*"[Title/Abstract] OR "vision transformer*"[Title/Abstract] OR "generative adversarial network*"[Title/Abstract] OR "variational autoencoder*"[Title/Abstract] OR autoencoder*[Title/Abstract] OR "diffusion model*"[Title/Abstract] OR "foundation model*"[Title/Abstract] OR "vision language model*"[Title/Abstract] OR "vision-language model*"[Title/Abstract] OR "multimodal model*"[Title/Abstract] OR "large language model*"[Title/Abstract] OR "object detection"[Title/Abstract] OR "semantic segmentation"[Title/Abstract] OR "instance segmentation"[Title/Abstract] OR "image classification"[Title/Abstract] OR "image segmentation"[Title/Abstract] OR "feature extraction"[Title/Abstract] OR "image recognition"[Title/Abstract] OR "class activation mapping"[Title/Abstract] OR "Grad-CAM"[Title/Abstract] OR "explainability"[Title/Abstract] OR "AlexNet"[Title/Abstract] OR "VGGNet"[Title/Abstract] OR "VGG-16"[Title/Abstract] OR "VGG-19"[Title/Abstract] OR "GoogLeNet"[Title/Abstract] OR "Inception"[Title/Abstract] OR "ResNet"[Title/Abstract] OR "ResNeXt"[Title/Abstract] OR "DenseNet"[Title/Abstract] OR "EfficientNet"[Title/Abstract] OR "MobileNet"[Title/Abstract] OR "U-Net"[Title/Abstract] OR "nnU-Net"[Title/Abstract] OR "Swin Transformer"[Title/Abstract] OR "Faster R-CNN"[Title/Abstract] OR "Mask R-CNN"[Title/Abstract] OR "RetinaNet"[Title/Abstract] OR "Detectron"[Title/Abstract] OR "DETR"[Title/Abstract] OR "DeepLab"[Title/Abstract] OR "YOLO"[Title/Abstract] OR "SimCLR"[Title/Abstract] OR "BYOL"[Title/Abstract] OR "MoCo"[Title/Abstract] OR "DINO"[Title/Abstract] OR "DINOv2"[Title/Abstract] OR "masked autoencoder"[Title/Abstract] OR "Contrastive Language-Image Pre-training"[Title/Abstract] OR "GPT-4V"[Title/Abstract] OR "GPT-4o"[Title/Abstract] OR "Gemini"[Title/Abstract] OR "LLaVA"[Title/Abstract] OR "CogVLM"[Title/Abstract] OR "InternVL"[Title/Abstract] OR "Qwen-VL"[Title/Abstract] OR "segment anything"[Title/Abstract] OR "ImageNet"[Title/Abstract] OR "BiomedCLIP"[Title/Abstract] OR "PubMedCLIP"[Title/Abstract] OR "MedCLIP"[Title/Abstract] OR "BioViL"[Title/Abstract] OR "LLaVA-Med"[Title/Abstract] OR "MedFlamingo"[Title/Abstract] OR "Med-PaLM"[Title/Abstract] OR "Med-Gemini"[Title/Abstract] OR "MedSAM"[Title/Abstract] OR "CheXagent"[Title/Abstract] OR "CheXzero"[Title/Abstract] OR "PathChat"[Title/Abstract] OR "CONCH"[Title/Abstract] OR "RETFound"[Title/Abstract] OR "GigaPath"[Title/Abstract] OR "Virchow"[Title/Abstract] OR "PLIP"[Title/Abstract]

)

AND

(

humans[MeSH Terms] OR "Diagnosis"[MeSH Terms] OR "Prognosis"[MeSH Terms] OR "Mass Screening"[MeSH Terms] OR "clinical"[Title/Abstract] OR clinician*[Title/Abstract] OR diagnos*[Title/Abstract] OR prognos*[Title/Abstract] OR "screening"[Title/Abstract] OR "grading"[Title/Abstract] OR "staging"[Title/Abstract] OR "triage"[Title/Abstract] OR "risk stratification"[Title/Abstract] OR "clinical trial"[Title/Abstract] OR "clinical validation"[Title/Abstract] OR "external validation"[Title/Abstract] OR "prospective"[Title/Abstract] OR "retrospective"[Title/Abstract] OR "cohort"[Title/Abstract] OR "patient"[Title/Abstract] OR "patients"[Title/Abstract] OR "surgical"[Title/Abstract] OR "intraoperative"[Title/Abstract] OR "perioperative"[Title/Abstract] OR "pathology"[Title/Abstract] OR "radiology"[Title/Abstract] OR "ophthalmology"[Title/Abstract] OR "dermatology"[Title/Abstract] OR "oncology"[Title/Abstract] OR "cardiology"[Title/Abstract] OR "gastroenterology"[Title/Abstract] OR "pulmonology"[Title/Abstract] OR "neurology"[Title/Abstract] OR "orthopedics"[Title/Abstract] OR "orthopaedics"[Title/Abstract] OR "obstetrics"[Title/Abstract] OR "gynecology"[Title/Abstract] OR "gynaecology"[Title/Abstract] OR "emergency medicine"[Title/Abstract] OR "pediatrics"[Title/Abstract] OR "paediatrics"[Title/Abstract] OR "hematology"[Title/Abstract] OR "haematology"[Title/Abstract] OR "otolaryngology"[Title/Abstract] OR "urology"[Title/Abstract] OR "rheumatology"[Title/Abstract] OR "nephrology"[Title/Abstract] OR "intensive care"[Title/Abstract] OR "critical care"[Title/Abstract] OR "neonatology"[Title/Abstract] OR "radiation oncology"[Title/Abstract] OR "dentistry"[Title/Abstract]

)

NOT

(

review[Publication Type] OR "systematic review"[Publication Type] OR meta-analysis[Publication Type] OR comment[Publication Type] OR editorial[Publication Type] OR letter[Publication Type] OR published erratum[Publication Type] OR "case reports"[Publication Type] OR ("animals"[MeSH Terms] NOT "humans"[MeSH Terms])

)

AND ("2012/01/01"[Date - Publication] : "3000"[Date - Publication])

**EMBASE Query:**

('computer vision':ti,ab OR 'medical imaging':ti,ab OR 'clinical imaging':ti,ab OR 'diagnostic imaging':ti,ab OR 'diagnostic imaging'/exp OR radiograph*:ti,ab OR 'x ray':ti,ab OR 'x-ray':ti,ab OR 'x-rays':ti,ab OR 'computed tomography':ti,ab OR 'ct scan':ti,ab OR 'ct imaging':ti,ab OR 'computer assisted tomography'/exp OR 'nuclear magnetic resonance imaging':ti,ab OR 'mr imaging':ti,ab OR 'mri':ti,ab OR 'nuclear magnetic resonance imaging'/exp OR mammograph*:ti,ab OR 'mammogram':ti,ab OR 'mammography'/exp OR fluoroscop*:ti,ab OR 'fluoroscopy'/exp OR angiograph*:ti,ab OR 'angiography'/exp OR 'positron emission tomography':ti,ab OR 'pet-ct':ti,ab OR 'pet/ct':ti,ab OR 'positron emission tomography'/exp OR 'spect':ti,ab OR 'single photon emission computer tomography'/exp OR scintigraph*:ti,ab OR 'ultrasound':ti,ab OR ultrasonograph*:ti,ab OR 'echography'/exp OR echocardiograph*:ti,ab OR 'echocardiography'/exp OR 'whole slide':ti,ab OR 'whole-slide':ti,ab OR histolog*:ti,ab OR histopatholog*:ti,ab OR cytolog*:ti,ab OR 'digital pathology':ti,ab OR 'histology'/exp OR endoscop*:ti,ab OR colonoscop*:ti,ab OR bronchoscop*:ti,ab OR cystoscop*:ti,ab OR laryngoscop*:ti,ab OR hysteroscop*:ti,ab OR 'capsule endoscopy':ti,ab OR gastroscop*:ti,ab OR 'esophagogastroduodenoscopy':ti,ab OR 'oesophagogastroduodenoscopy':ti,ab OR 'endoscopy'/exp OR 'fundus':ti,ab OR fundoscop*:ti,ab OR 'optical coherence tomography':ti,ab OR 'optical coherence tomography'/exp OR 'slit-lamp':ti,ab OR 'slit lamp':ti,ab OR 'retinal imaging':ti,ab OR 'fundus oculi'/exp OR dermoscop*:ti,ab OR dermatoscop*:ti,ab OR 'dermoscopy'/exp OR 'surgical video':ti,ab OR laparoscop*:ti,ab OR 'robotic surgery':ti,ab OR 'intraoperative imaging':ti,ab OR 'laparoscopy'/exp OR 'orthopantomography':ti,ab OR 'panoramic radiograph':ti,ab OR 'dental radiograph*':ti,ab OR 'cone beam computed tomography':ti,ab OR 'cbct':ti,ab OR 'cone beam computed tomography'/exp OR 'blood smear':ti,ab OR 'peripheral blood':ti,ab OR 'bone marrow':ti,ab OR 'blood film':ti,ab OR otoscop*:ti,ab OR 'otoscopy'/exp OR 'fetal ultrasound':ti,ab OR 'obstetric ultrasound':ti,ab OR 'prenatal ultrasound':ti,ab OR 'fetus echography'/exp)

AND

('artificial intelligence':ti,ab OR 'artificial intelligence'/exp OR 'deep learning':ti,ab OR 'deep learning'/exp OR 'machine learning':ti,ab OR 'machine learning'/exp OR 'neural network':ti,ab OR 'neural networks':ti,ab OR 'neural network'/exp OR 'transfer learning':ti,ab OR 'self-supervised learning':ti,ab OR 'contrastive learning':ti,ab OR 'semi-supervised learning':ti,ab OR 'federated learning':ti,ab OR 'attention mechanism':ti,ab OR 'pre-trained model':ti,ab OR 'pretrained model':ti,ab OR 'convolutional neural network*':ti,ab OR 'vision transformer*':ti,ab OR 'generative adversarial network*':ti,ab OR 'variational autoencoder*':ti,ab OR autoencoder*:ti,ab OR 'diffusion model*':ti,ab OR 'foundation model*':ti,ab OR 'vision language model*':ti,ab OR 'vision-language model*':ti,ab OR 'multimodal model*':ti,ab OR 'large language model*':ti,ab OR 'object detection':ti,ab OR 'semantic segmentation':ti,ab OR 'instance segmentation':ti,ab OR 'image classification':ti,ab OR 'image segmentation':ti,ab OR 'feature extraction':ti,ab OR 'image recognition':ti,ab OR 'class activation mapping':ti,ab OR 'grad-cam':ti,ab OR 'explainability':ti,ab OR 'alexnet':ti,ab OR 'vggnet':ti,ab OR 'vgg-16':ti,ab OR 'vgg-19':ti,ab OR 'googlenet':ti,ab OR 'inception':ti,ab OR 'resnet':ti,ab OR 'resnext':ti,ab OR 'densenet':ti,ab OR 'efficientnet':ti,ab OR 'mobilenet':ti,ab OR 'u-net':ti,ab OR 'nnu-net':ti,ab OR 'swin transformer':ti,ab OR 'faster r-cnn':ti,ab OR 'mask r-cnn':ti,ab OR 'retinanet':ti,ab OR 'detectron':ti,ab OR 'detr':ti,ab OR 'deeplab':ti,ab OR 'yolo':ti,ab OR 'simclr':ti,ab OR 'byol':ti,ab OR 'moco':ti,ab OR 'dino':ti,ab OR 'dinov2':ti,ab OR 'masked autoencoder':ti,ab OR 'contrastive language-image pre-training':ti,ab OR 'gpt-4v':ti,ab OR 'gpt-4o':ti,ab OR 'gemini':ti,ab OR 'llava':ti,ab OR 'cogvlm':ti,ab OR 'internvl':ti,ab OR 'qwen-vl':ti,ab OR 'segment anything':ti,ab OR 'imagenet':ti,ab OR 'biomedclip':ti,ab OR 'pubmedclip':ti,ab OR 'medclip':ti,ab OR 'biovil':ti,ab OR 'llava-med':ti,ab OR 'medflamingo':ti,ab OR 'med-palm':ti,ab OR 'med-gemini':ti,ab OR 'medsam':ti,ab OR 'chexagent':ti,ab OR 'chexzero':ti,ab OR 'pathchat':ti,ab OR 'conch':ti,ab OR 'retfound':ti,ab OR 'gigapath':ti,ab OR 'virchow':ti,ab OR 'plip':ti,ab)

AND

('human'/de OR 'clinical':ti,ab OR clinician*:ti,ab OR diagnos*:ti,ab OR prognos*:ti,ab OR 'screening':ti,ab OR 'grading':ti,ab OR 'staging':ti,ab OR 'triage':ti,ab OR 'risk stratification':ti,ab OR 'clinical trial':ti,ab OR 'clinical validation':ti,ab OR 'external validation':ti,ab OR 'prospective':ti,ab OR 'retrospective':ti,ab OR 'cohort':ti,ab OR 'patient':ti,ab OR 'patients':ti,ab OR 'surgical':ti,ab OR 'intraoperative':ti,ab OR 'perioperative':ti,ab OR 'pathology':ti,ab OR 'radiology':ti,ab OR 'ophthalmology':ti,ab OR 'dermatology':ti,ab OR 'oncology':ti,ab OR 'cardiology':ti,ab OR 'gastroenterology':ti,ab OR 'pulmonology':ti,ab OR 'neurology':ti,ab OR 'orthopedics':ti,ab OR 'orthopaedics':ti,ab OR 'obstetrics':ti,ab OR 'gynecology':ti,ab OR 'gynaecology':ti,ab OR 'emergency medicine':ti,ab OR 'pediatrics':ti,ab OR 'paediatrics':ti,ab OR 'hematology':ti,ab OR 'haematology':ti,ab OR 'otolaryngology':ti,ab OR 'urology':ti,ab OR 'rheumatology':ti,ab OR 'nephrology':ti,ab OR 'intensive care':ti,ab OR 'critical care':ti,ab OR 'neonatology':ti,ab OR 'radiation oncology':ti,ab OR 'dentistry':ti,ab)

NOT

(

'review'/it OR 'systematic review'/it OR 'meta analysis'/it OR 'editorial'/it OR 'letter'/it OR 'erratum'/it OR 'case report'/it OR 'conference abstract'/it

)

NOT

(

'animal'/de NOT 'human'/de

)

AND [2012-01-01]/sd

**Scopus Query:**

((TITLE-ABS-KEY("computer vision" OR "medical imaging" OR "clinical imaging" OR "diagnostic imaging" OR radiograph* OR "X-ray" OR "X-rays" OR "computed tomography" OR "CT scan" OR "CT imaging" OR "magnetic resonance imaging" OR "MR imaging" OR "MRI" OR mammograph* OR "mammogram" OR fluoroscop* OR angiograph* OR "positron emission tomography" OR "PET-CT" OR "PET/CT" OR "SPECT" OR scintigraph* OR "ultrasound" OR ultrasonograph* OR echocardiograph* OR "whole slide" OR "whole-slide" OR histolog* OR histopatholog* OR cytolog* OR "digital pathology" OR endoscop* OR colonoscop* OR bronchoscop* OR cystoscop* OR laryngoscop* OR hysteroscop* OR "capsule endoscopy" OR gastroscop* OR "esophagogastroduodenoscopy" OR "oesophagogastroduodenoscopy" OR "fundus" OR fundoscop* OR "optical coherence tomography" OR "slit-lamp" OR "slit lamp" OR "retinal imaging" OR dermoscop* OR dermatoscop* OR "surgical video" OR laparoscop* OR "robotic surgery" OR "intraoperative imaging" OR "orthopantomography" OR "panoramic radiograph" OR "dental radiograph*" OR "cone beam computed tomography" OR "CBCT" OR "blood smear" OR "peripheral blood" OR "bone marrow" OR "blood film" OR otoscop* OR "fetal ultrasound" OR "obstetric ultrasound" OR "prenatal ultrasound"))

AND

(TITLE-ABS-KEY("artificial intelligence" OR "deep learning" OR "machine learning" OR "neural network" OR "neural networks" OR "transfer learning" OR "self-supervised learning" OR "contrastive learning" OR "semi-supervised learning" OR "federated learning" OR "attention mechanism" OR "pre-trained model" OR "pretrained model" OR "convolutional neural network*" OR "vision transformer*" OR "generative adversarial network*" OR "variational autoencoder*" OR autoencoder* OR "diffusion model*" OR "foundation model*" OR "vision language model*" OR "vision-language model*" OR "multimodal model*" OR "large language model*" OR "object detection" OR "semantic segmentation" OR "instance segmentation" OR "image classification" OR "image segmentation" OR "feature extraction" OR "image recognition" OR "class activation mapping" OR "Grad-CAM" OR "explainability" OR "AlexNet" OR "VGGNet" OR "VGG-16" OR "VGG-19" OR "GoogLeNet" OR "Inception" OR "ResNet" OR "ResNeXt" OR "DenseNet" OR "EfficientNet" OR "MobileNet" OR "U-Net" OR "nnU-Net" OR "Swin Transformer" OR "Faster R-CNN" OR "Mask R-CNN" OR "RetinaNet" OR "Detectron" OR "DETR" OR "DeepLab" OR "YOLO" OR "SimCLR" OR "BYOL" OR "MoCo" OR "DINO" OR "DINOv2" OR "masked autoencoder" OR "Contrastive Language-Image Pre-training" OR "GPT-4V" OR "GPT-4o" OR "Gemini" OR "LLaVA" OR "CogVLM" OR "InternVL" OR "Qwen-VL" OR "segment anything" OR "ImageNet" OR "BiomedCLIP" OR "PubMedCLIP" OR "MedCLIP" OR "BioViL" OR "LLaVA-Med" OR "MedFlamingo" OR "Med-PaLM" OR "Med-Gemini" OR "MedSAM" OR "CheXagent" OR "CheXzero" OR "PathChat" OR "CONCH" OR "RETFound" OR "GigaPath" OR "Virchow" OR "PLIP"))

AND

(TITLE-ABS-KEY("clinical" OR clinician* OR diagnos* OR prognos* OR "screening" OR "grading" OR "staging" OR "triage" OR "risk stratification" OR "clinical trial" OR "clinical validation" OR "external validation" OR "prospective" OR "retrospective" OR "cohort" OR "patient" OR "patients" OR "surgical" OR "intraoperative" OR "perioperative" OR "pathology" OR "radiology" OR "ophthalmology" OR "dermatology" OR "oncology" OR "cardiology" OR "gastroenterology" OR "pulmonology" OR "neurology" OR "orthopedics" OR "orthopaedics" OR "obstetrics" OR "gynecology" OR "gynaecology" OR "emergency medicine" OR "pediatrics" OR "paediatrics" OR "hematology" OR "haematology" OR "otolaryngology" OR "urology" OR "rheumatology" OR "nephrology" OR "intensive care" OR "critical care" OR "neonatology" OR "radiation oncology" OR "dentistry")))

AND PUBYEAR > 2011

AND TITLE-ABS-KEY("patient*" OR "clinical" OR "human*")

AND NOT (DOCTYPE(re) OR DOCTYPE(rv) OR DOCTYPE(ed) OR DOCTYPE(le) OR DOCTYPE(er) OR DOCTYPE(sh))

AND NOT (TITLE-ABS-KEY("animal model*" OR "mouse model*" OR "rat model*" OR "murine" OR "in vitro" OR "in vivo" OR "rodent*"))
