# Supplementary material
Source: Research Square preprint supplement (doi:10.21203/rs.3.rs-9861346/v1)
Supplement: Supplementary file 2 [file 9f1993a4070a43e68c82a30e.docx]

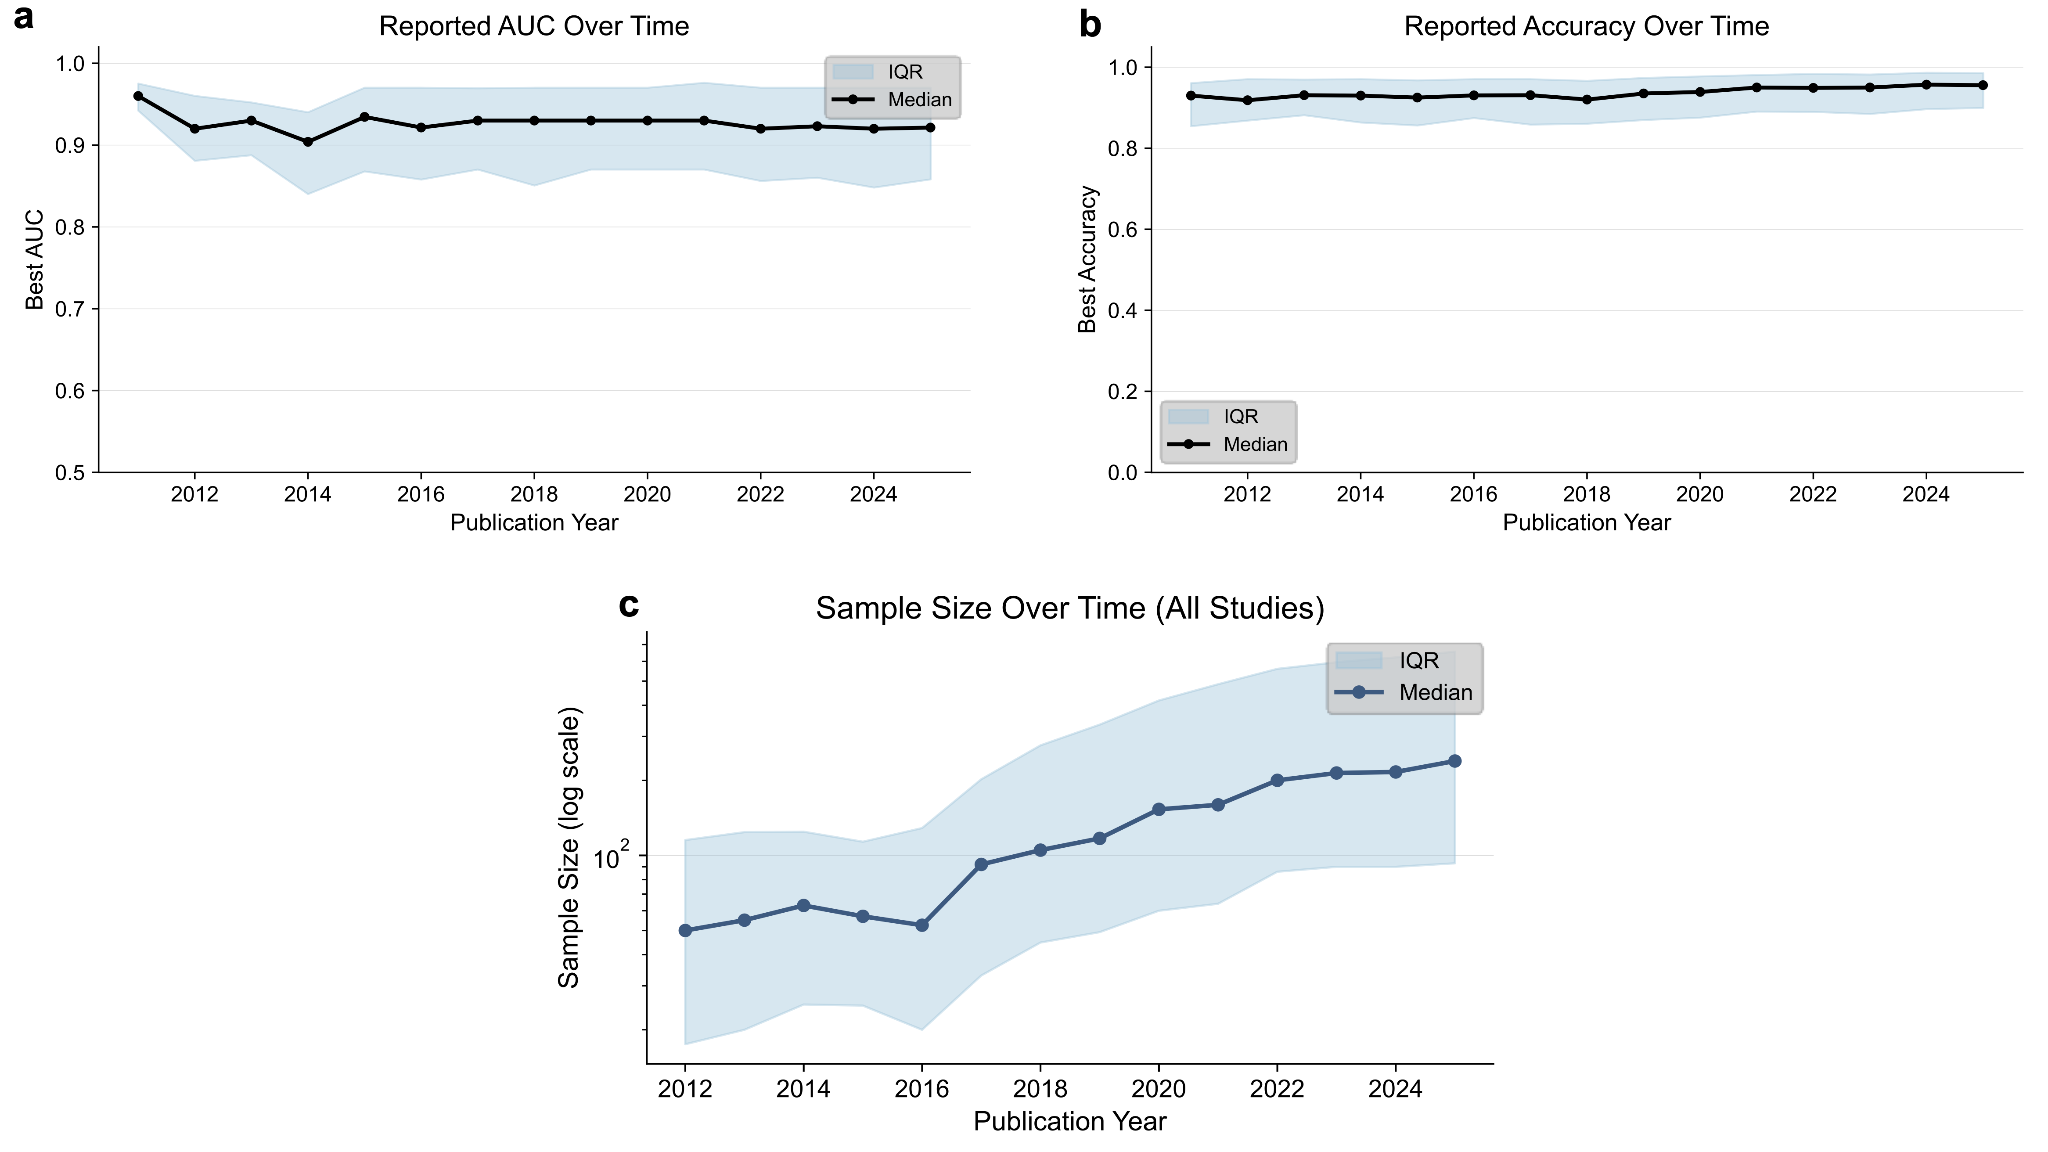


**Extended Data Figure 1.** Trends in study reported **a)** AUC, **b)** accuracy, and **c)** sample size over time.


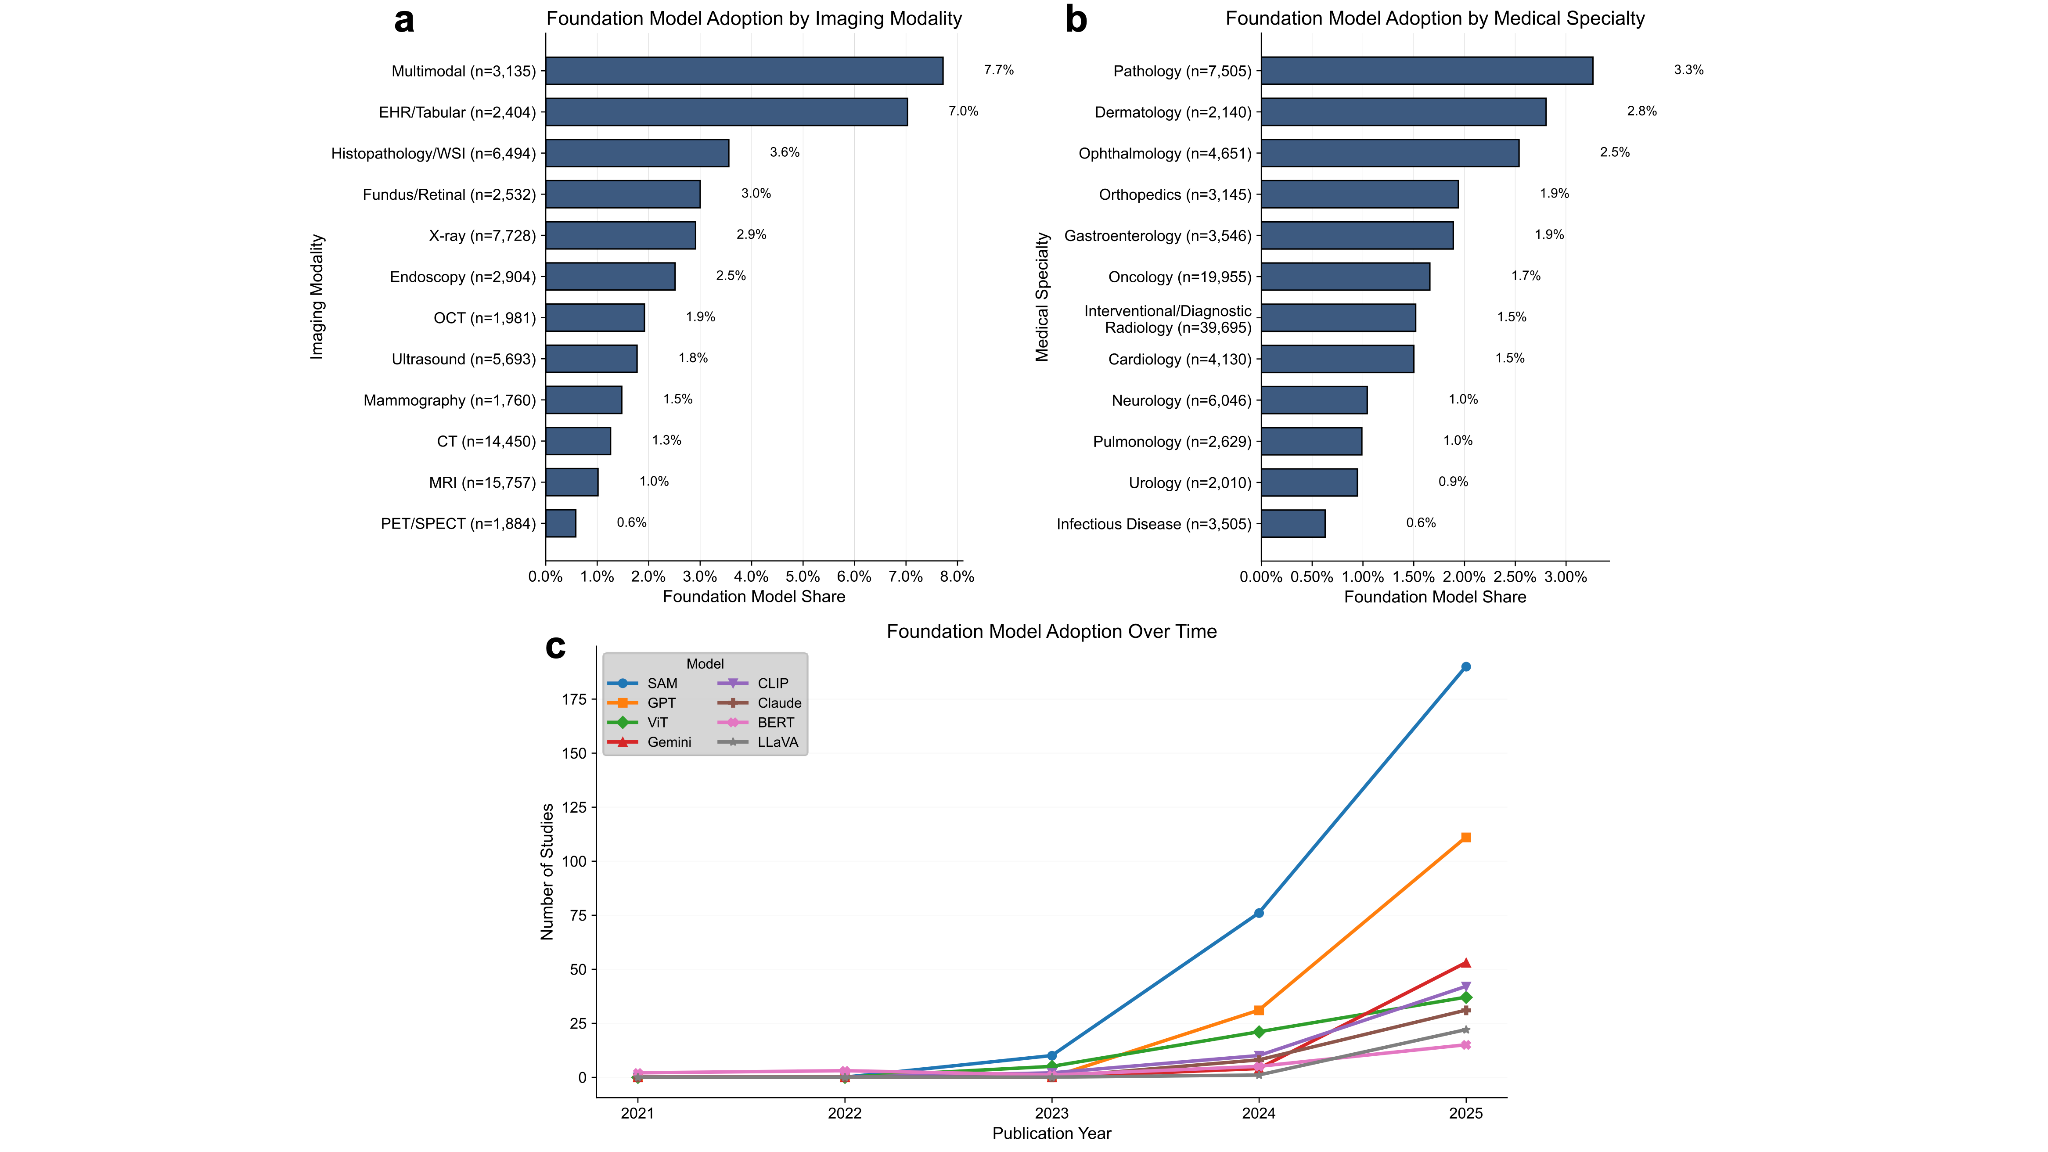


**Extended Data Figure 2.** Breakdown of foundation model usage among **a)** imaging modality, **b)** medical specialty, and **c)** trends over time.


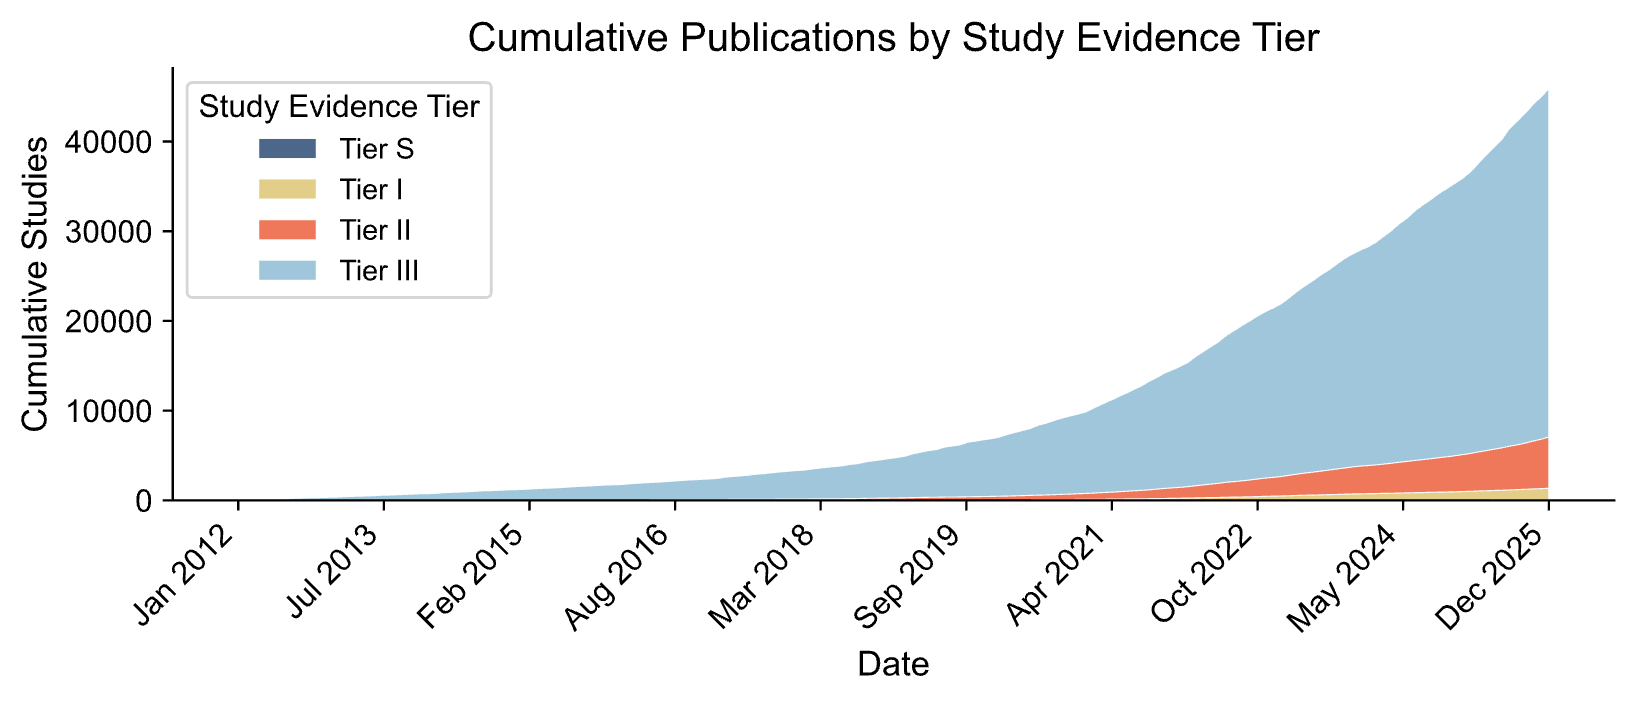


**Extended Data Figure 3.** Cumulative publications per year by study evidence tier from January 2012 to December 2025.

﻿
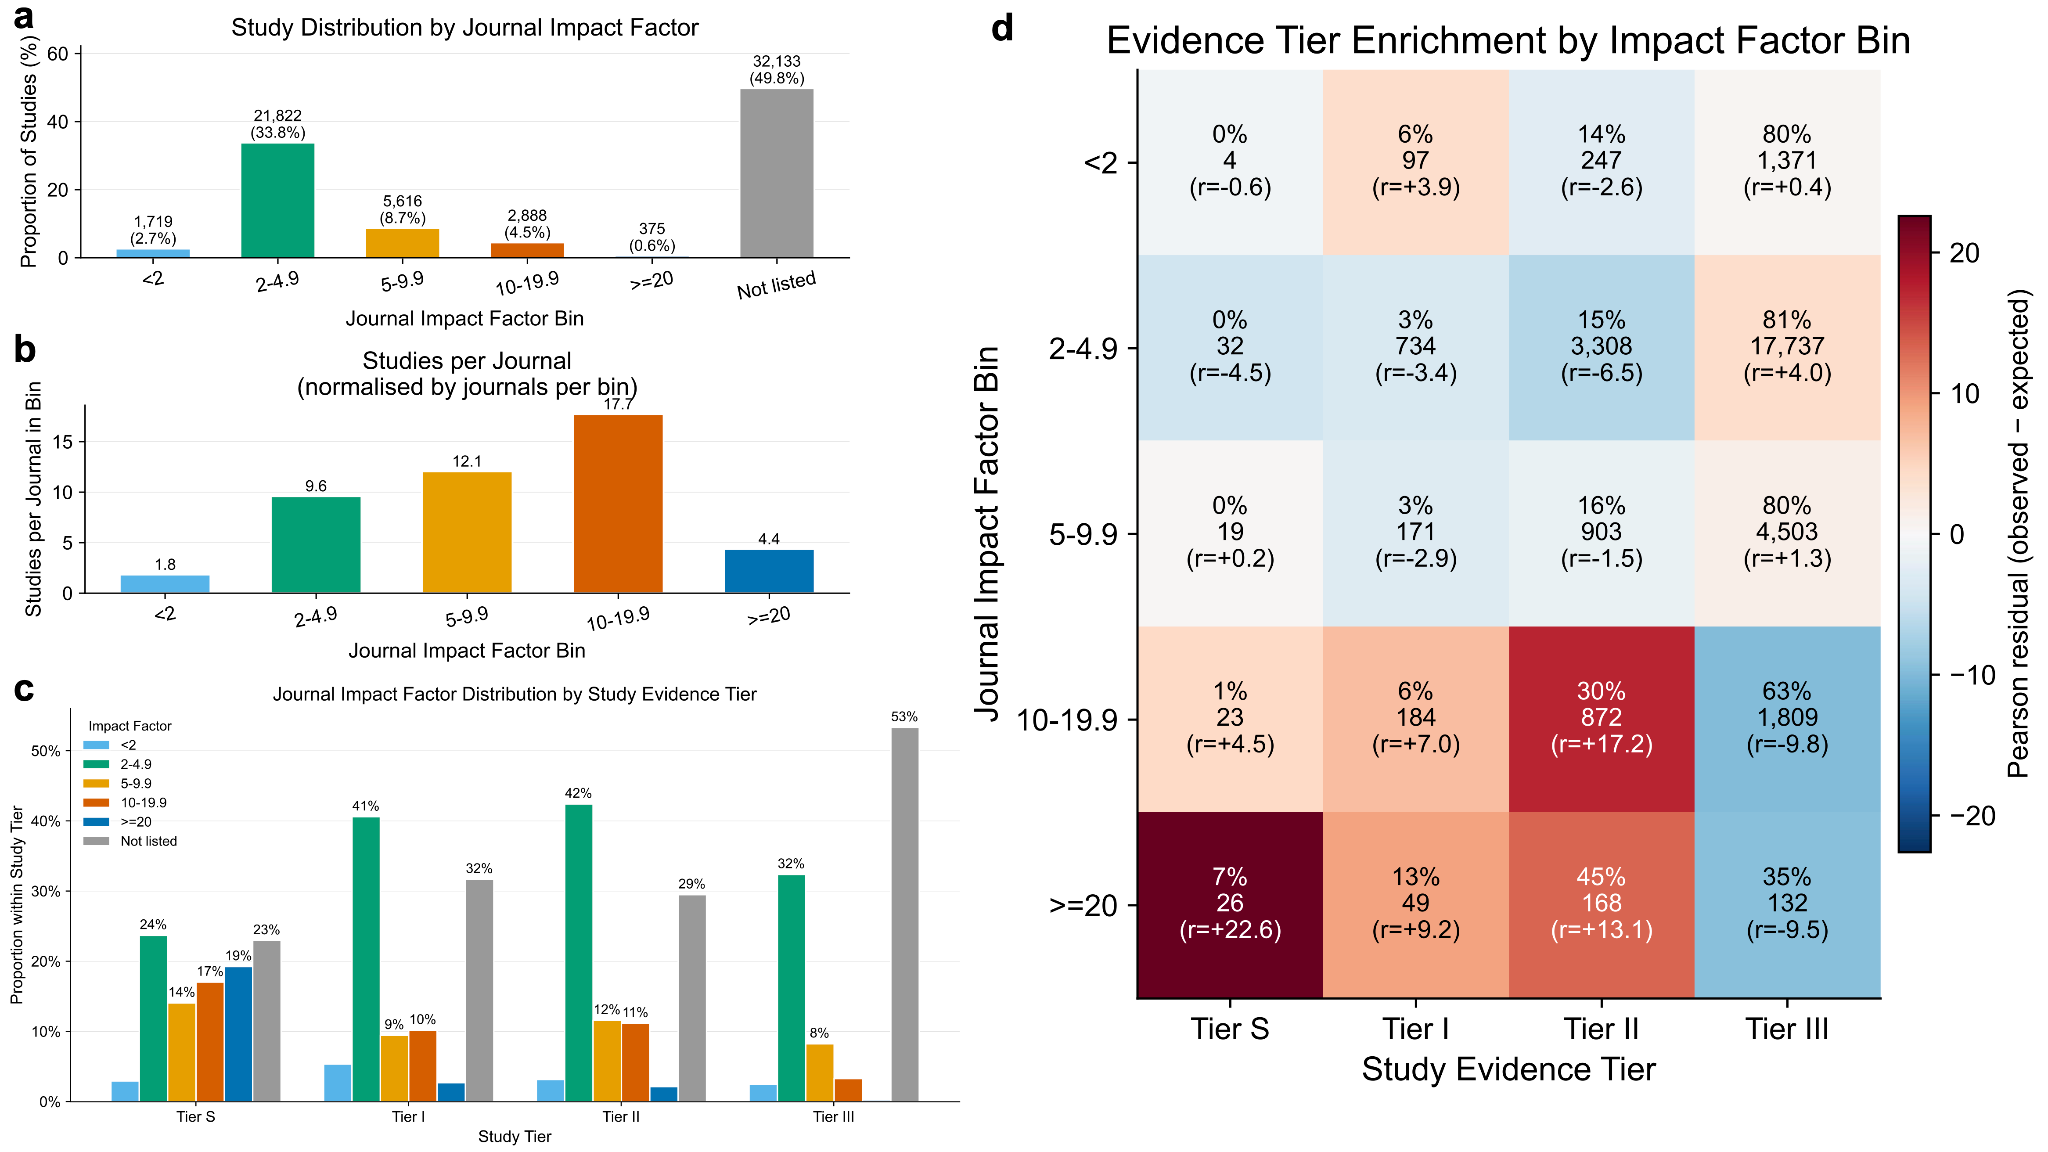


**Extended Data Figure 4. a)** Breakdown of study evidence tier and journal impact factor bin. **b)** Proportion of studies among journal impact factor bins and **c)** number of studies per journal per bin. **d)** Enrichment of evidence tier by journal impact factor bin.

﻿
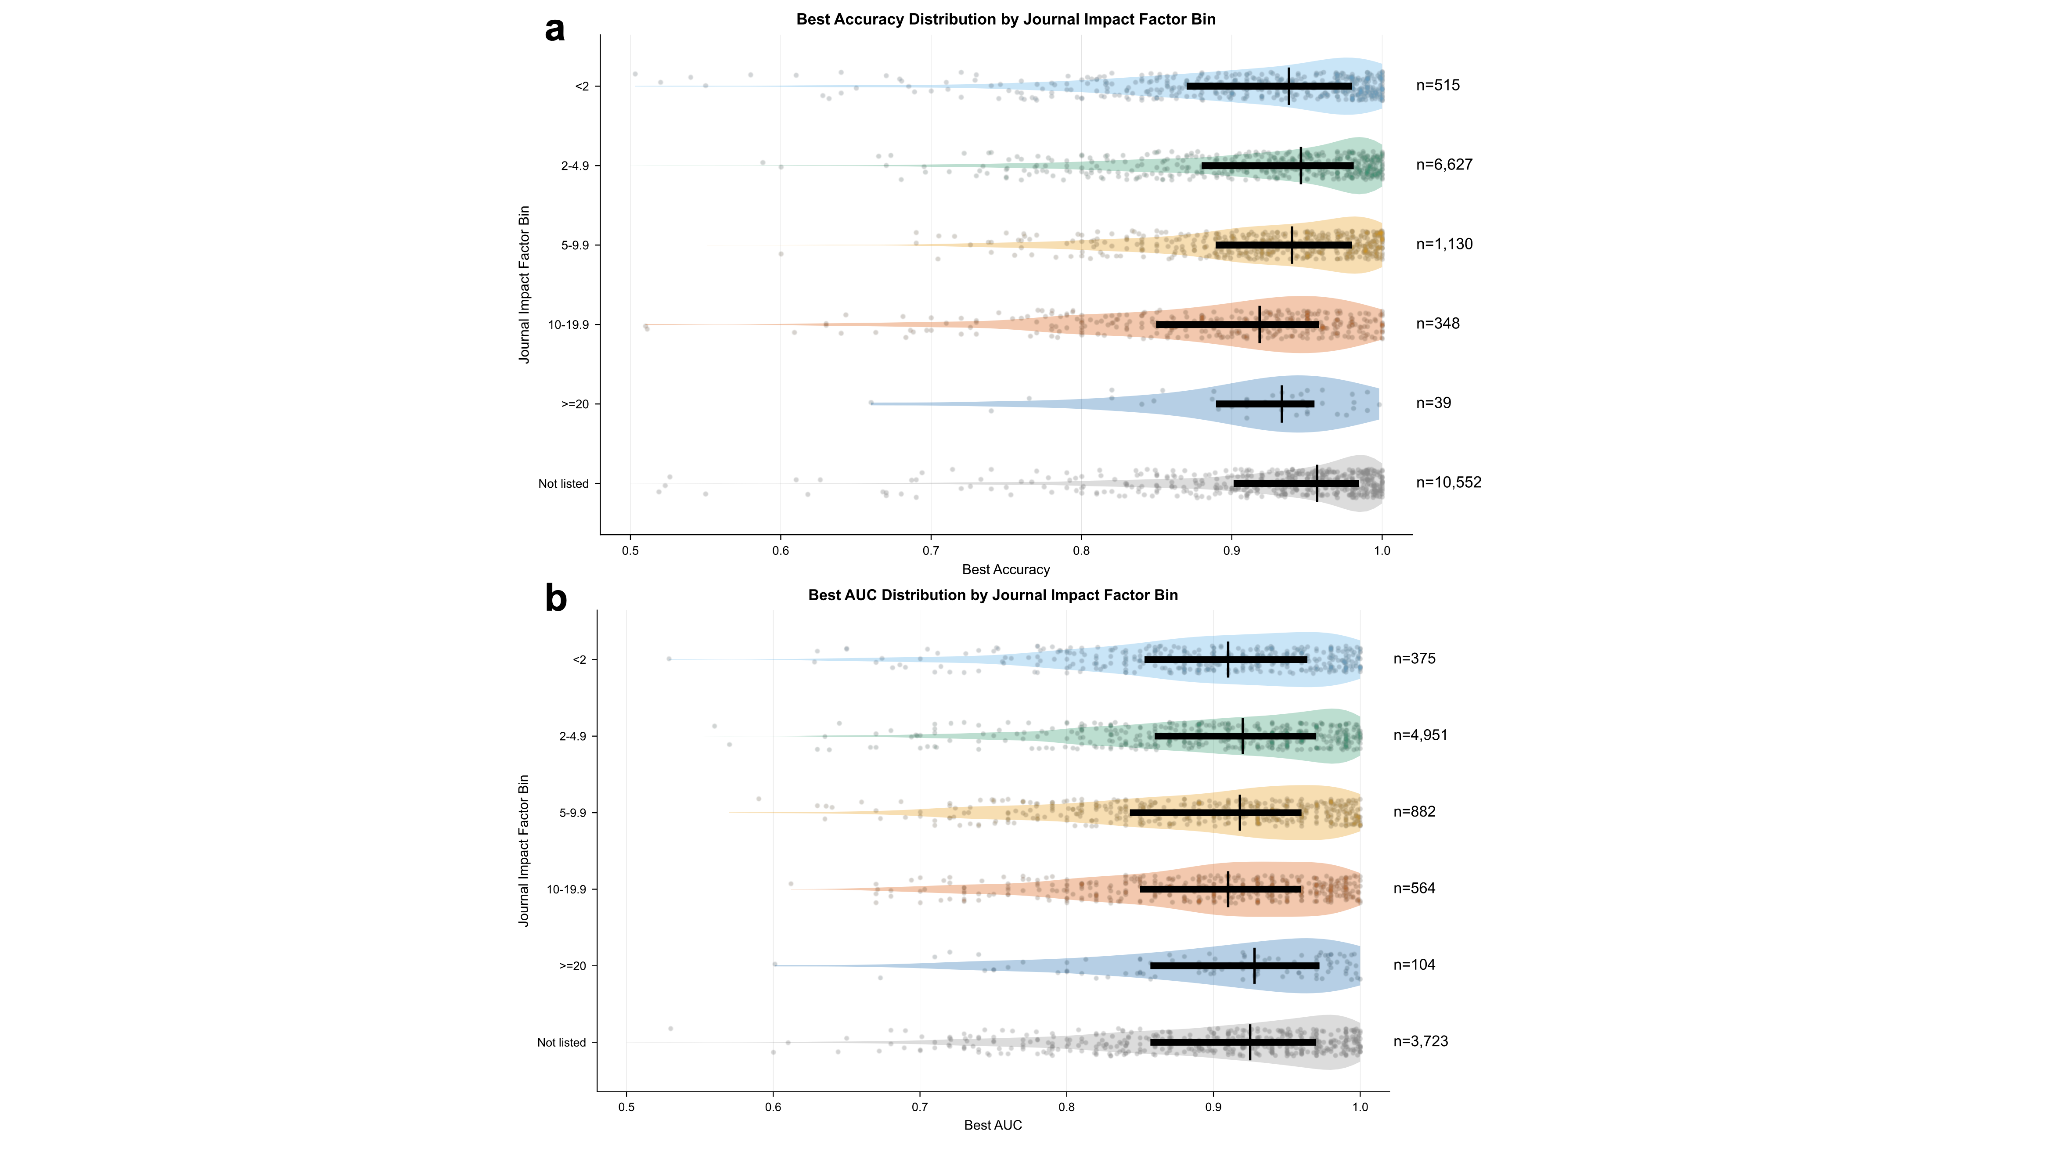


**Extended Data Figure 5.** Ranges of **a)** AUC and **b)** accuracy based on journal impact factor.


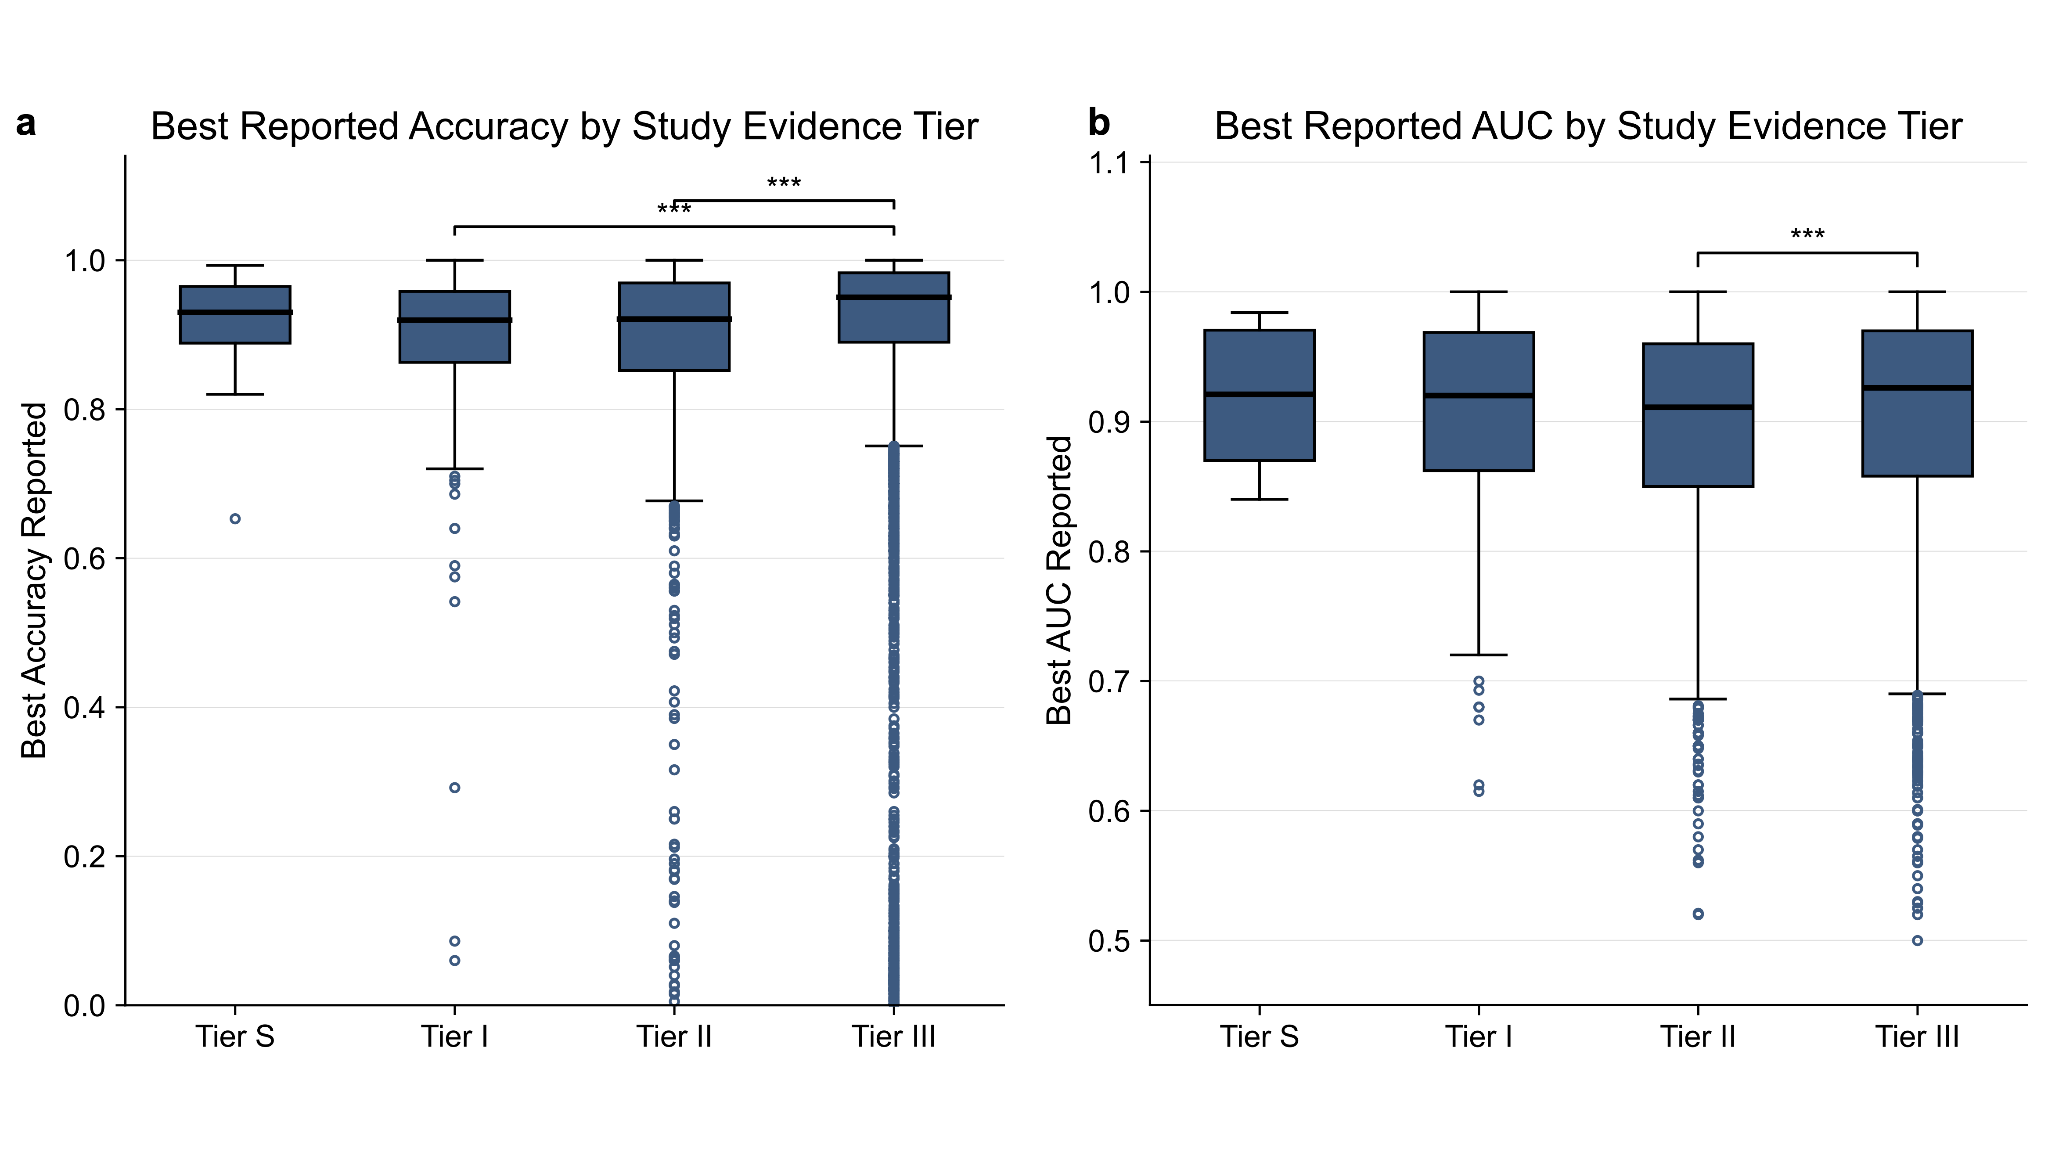


**Extended Data Figure 6. a)** Best reported accuracy by study evidence tier. Significant differences were observed in accuracy between Tier I and Tier III as well as Tier II and Tier III (p < 0.001). **b)** Best reported AUC by study evidence tier. Significant differences were observed in AUC between Tier II and Tier III (p < 0.001).


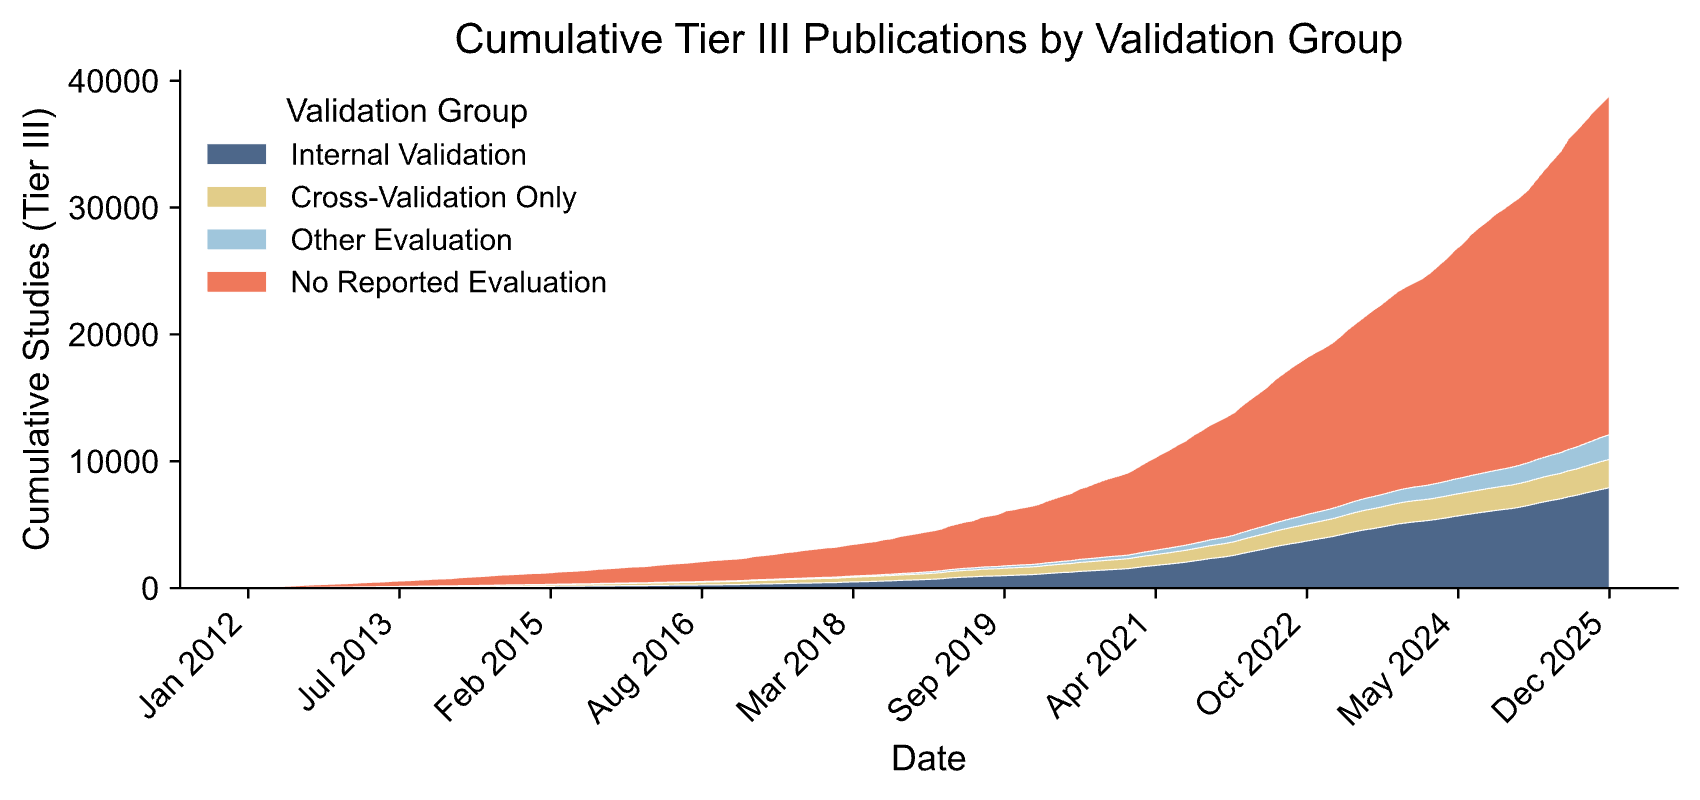


**Extended Data Figure 7.** Trends in study evidence tier III by validation, including internal validation, cross-validation, other evaluation, and no reported evaluation.


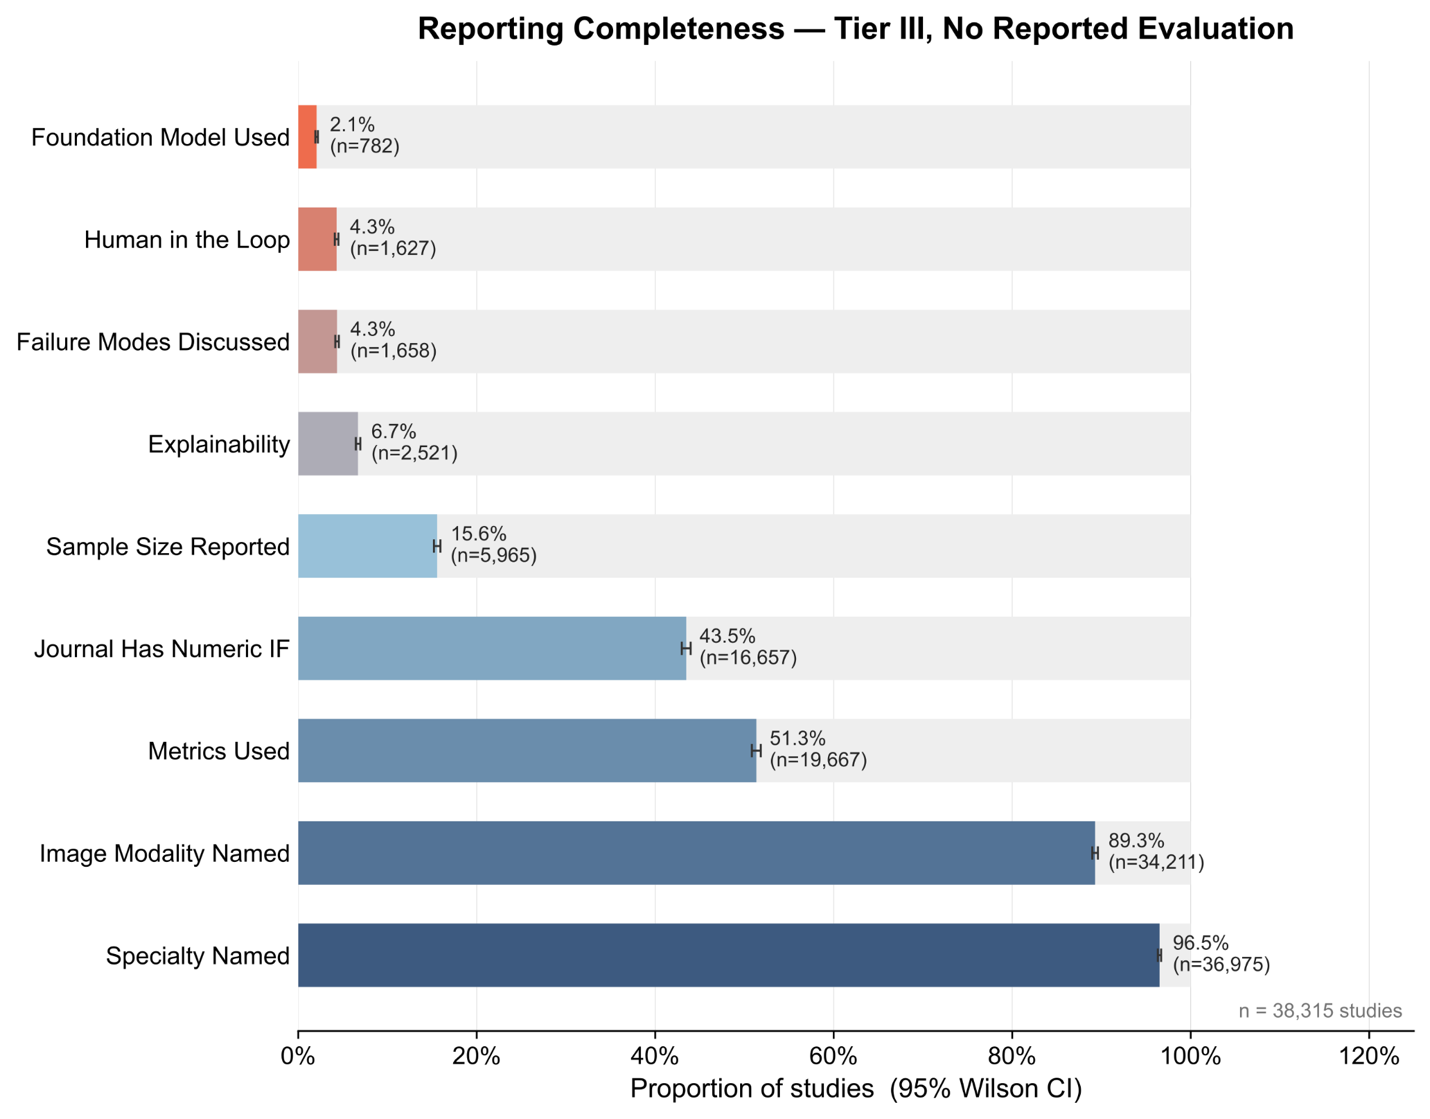


**Extended Data Figure 8.** Out of the 39,434 studies without validation metrics reported, abstract completeness based on other factors is shown.
